# Supplementary material for: Supporting meningitis diagnosis amongst infants and children through the use of fuzzy cognitive mapping
Source: Springer Nature journal article supplement (doi:10.1186/1472-6947-12-98), 2012-09-04
Supplement: 12911_2011_545_MOESM1_ESM.pdf [file 12911_2011_545_MOESM1_ESM.pdf]

## APPENDIX

Table A: FCM tool results in different percentage of accuracy for different  $\lambda$  values

| #Patient | Treated for Meningitis | Value of concept node Meningitis ( $M_n$ ) after the system reaches an equilibrium state |               |               |               |                |               |               |               |               |               |             |
|----------|------------------------|------------------------------------------------------------------------------------------|---------------|---------------|---------------|----------------|---------------|---------------|---------------|---------------|---------------|-------------|
|          |                        | $\lambda=0.1$                                                                            | $\lambda=0.2$ | $\lambda=0.3$ | $\lambda=0.4$ | $\lambda=0.45$ | $\lambda=0.5$ | $\lambda=0.6$ | $\lambda=0.7$ | $\lambda=0.8$ | $\lambda=0.9$ | $\lambda=1$ |
| 1        | Present/Yes            | 31.5462                                                                                  | 57.382        | 75.2979       | 71.4849       | 77.2711        | 82.1007       | 89.2602       | 93.7929       | 98.9303       | 99.4419       | 99.7092     |
| 2        | Present/Yes            | 31.0095                                                                                  | 56.5784       | 74.5145       | 68.5349       | 77.3695        | 82.2576       | 89.8135       | 93.9915       | 96.6939       | 98.2401       | 99.0925     |
| 3        | Absent/No              | 13.8945                                                                                  | 20.8027       | 32.186        | 43.6734       | 49.2829        | 54.7068       | 64.7285       | 73.364        | 80.4396       | 85.9858       | 90.1764     |
| 4        | Absent/No              | 18.8566                                                                                  | 36.4183       | 40.2929       | 53.7139       | 59.9318        | 65.6952       | 75.628        | 83.3042       | 88.9373       | 92.8725       | 95.5187     |
| 5        | Present/Yes            | 34.2039                                                                                  | 61.243        | 78.916        | 74.7142       | 80.2604        | 84.7809       | 91.2551       | 95.1651       | 99.3346       | 99.6732       | 99.8397     |
| 6        | Absent/No              | 6.8214                                                                                   | 14.3181       | 22.4346       | 31.0449       | 35.4704        | 39.9323       | 48.7963       | 57.3298       | 65.23         | 72.2591       | 78.2895     |
| 7        | Present/Yes            | 30.3209                                                                                  | 55.5361       | 73.4831       | 74.8076       | 80.3924        | 84.9384       | 91.4263       | 95.315        | 98.6731       | 99.2883       | 99.6189     |
| 8        | Absent/No              | 8.7664                                                                                   | 18.3855       | 28.6921       | 38.9751       | 44.2057        | 49.3509       | 59.1379       | 67.9464       | 75.5079       | 81.7217       | 86.6417     |
| 9        | Present/Yes            | 27.4986                                                                                  | 51.1309       | 68.9368       | 66.0131       | 72.055         | 77.2894       | 85.4506       | 91.0099       | 97.8371       | 98.7643       | 99.2955     |
| 10       | Absent/No              | 7.2143                                                                                   | 15.2397       | 24.0044       | 33.3424       | 38.1397        | 42.963        | 52.4688       | 61.4481       | 69.5346       | 76.4829       | 82.2097     |
| 11       | Present/Yes            | 28.2825                                                                                  | 52.3755       | 70.2515       | 74.4313       | 72.2148        | 82.9911       | 89.9996       | 94.3513       | 98.1095       | 98.9387       | 99.4053     |
| 12       | Absent/No              | 6.3625                                                                                   | 13.3678       | 20.9786       | 29.0999       | 33.2999        | 37.5567       | 46.0937       | 54.4376       | 62.3005       | 69.4333       | 75.6768     |
| 13       | Absent/No              | 4.2379                                                                                   | 8.9492        | 14.1353       | 13.8176       | 22.7909        | 25.89         | 32.3484       | 39.0668       | 45.9059       | 52.6885       | 59.2323     |
| 14       | Present/Yes            | 32.9262                                                                                  | 59.4114       | 77.2299       | 73.1966       | 78.8643        | 83.5432       | 90.341        | 94.5443       | 99.163        | 99.5768       | 99.7862     |
| 15       | Present/Yes            | 33.14                                                                                    | 59.7211       | 77.5189       | 73.6411       | 79.2938        | 83.9438       | 90.6612       | 94.7785       | 99.1944       | 99.5946       | 99.7962     |
| 16       | Absent/No              | 7.17                                                                                     | 15.0385       | 22.534        | 32.5043       | 37.0922        | 41.6988       | 50.7823       | 59.4251       | 67.3189       | 74.2406       | 80.0907     |
| 17       | Present/Yes            | 28.3101                                                                                  | 52.419        | 70.2971       | 67.1651       | 73.1681        | 78.3317       | 86.2977       | 91.6456       | 98.1185       | 98.9444       | 99.4088     |
| 18       | Absent/No              | 6.5697                                                                                   | 13.7972       | 21.6371       | 29.9813       | 34.2848        | 38.6363       | 47.3263       | 55.7623       | 63.6489       | 70.7407       | 76.8916     |
| 19       | Present/Yes            | 37.3858                                                                                  | 65.6023       | 82.7041       | 78.2209       | 83.4241        | 87.5451       | 93.2091       | 96.4422       | 99.6284       | 99.8305       | 99.9227     |
| 20       | Present/Yes            | 25.1628                                                                                  | 47.3289       | 64.7772       | 57.4172       | 68.6532        | 74.0591       | 82.7494       | 88.9241       | 96.7854       | 98.0654       | 98.8388     |
| 21       | Absent/No              | 15.3722                                                                                  | 30.0346       | 34.5173       | 46.5754       | 52.9028        | 57.9238       | 67.9901       | 76.3994       | 83.1009       | 88.0219       | 91.946      |
| 22       | Absent/No              | 14.8347                                                                                  | 29.0306       | 42.0542       | 43.6736       | 49.2832        | 54.7073       | 64.7434       | 73.364        | 80.4397       | 85.9859       | 90.1759     |
| 23       | Present/Yes            | 30.8331                                                                                  | 56.3127       | 74.2532       | 71.0216       | 76.8913        | 81.803        | 89.1051       | 93.7306       | 98.7871       | 99.3569       | 99.6595     |
| 24       | Absent/No              | 8.4318                                                                                   | 17.6967       | 27.4625       | 37.6488       | 42.7586        | 47.8075       | 57.4865       | 66.3014       | 73.9667       | 80.3504       | 85.4723     |
| 25       | Absent/No              | 14.2817                                                                                  | 21.22         | 32.8001       | 44.4425       | 50.1063        | 55.5664       | 65.6047       | 74.1911       | 81.1723       | 86.6022       | 90.6736     |
| 26       | Present/Yes            | 23.3511                                                                                  | 44.2874       | 61.2992       | 59.6824       | 65.8064        | 71.3066       | 80.3614       | 87.0108       | 95.6511       | 97.2752       | 98.2981     |
| 27       | Absent/No              | 16.3373                                                                                  | 31.8251       | 36.0215       | 48.4212       | 54.861         | 59.9321       | 69.9611       | 78.2109       | 84.652        | 89.4633       | 92.93       |
| 28       | Present/Yes            | 37.6049                                                                                  | 65.8919       | 82.9443       | 78.6027       | 83.7781        | 87.867        | 93.4426       | 96.5997       | 99.6432       | 99.8381       | 99.9265     |
| 29       | Absent/No              | 13.5119                                                                                  | 20.3898       | 31.5769       | 42.9071       | 48.4603        | 53.8455       | 63.8446       | 72.5234       | 79.6893       | 85.3499       | 89.6596     |
| 30       | Absent/No              | 20.2991                                                                                  | 38.9915       | 54.942        | 61.2876       | 67.5815        | 73.1875       | 82.6702       | 88.7284       | 93.0788       | 95.8761       | 97.6082     |
| 31       | Present/Yes            | 36.0795                                                                                  | 63.8478       | 81.218        | 76.5039       | 81.9433        | 86.3144       | 92.4184       | 95.9683       | 99.5271       | 99.7776       | 99.8955     |
| 32       | Absent/No              | 13.8945                                                                                  | 20.8027       | 32.186        | 43.6734       | 49.2829        | 54.7068       | 64.7285       | 73.364        | 80.4396       | 85.9858       | 90.1764     |
| 33       | Present/Yes            | 24.8018                                                                                  | 46.7292       | 64.1018       | 61.9816       | 68.1008        | 73.5283       | 82.295        | 88.5649       | 96.5846       | 97.928        | 98.7464     |

|    |                      |            |            |            |            |               |            |            |               |               |            |            |
|----|----------------------|------------|------------|------------|------------|---------------|------------|------------|---------------|---------------|------------|------------|
| 34 | Present/Yes          | 23.9695    | 45.3343    | 62.5111    | 60.6737    | 66.7989       | 72.2711    | 81.207     | 87.6954       | 96.0753       | 97.5746    | 98.5055    |
| 35 | Present/Yes          | 28.3055    | 52.4118    | 70.2895    | 67.1586    | 73.1619       | 78.3259    | 88.4489    | 91.6422       | 98.117        | 98.9434    | 99.4082    |
| 36 | Absent/No            | 8.8892     | 18.5654    | 29.0711    | 39.4577    | 44.7308       | 49.9091    | 59.7309    | 68.5323       | 76.0519       | 82.2016    | 87.0473    |
| 37 | Present/Yes          | 35.456     | 62.993     | 80.4751    | 76.1398    | 81.5573       | 85.9235    | 92.0761    | 95.7104       | 99.4699       | 99.7471    | 99.8794    |
| 38 | Present/Yes          | 35.3817    | 62.8903    | 80.385     | 76.6572    | 82.081        | 86.434     | 92.5017    | 96.0222       | 99.4627       | 99.0007    | 99.5253    |
| 39 | Absent/No            | 20.6201    | 39.5582    | 48.4221    | 62.9014    | 69.1738       | 74.709     | 83.555     | 89.7203       | 93.7973       | 96.3701    | 97.9338    |
| 40 | Absent/No            | 19.1554    | 36.9548    | 52.4009    | 52.7566    | 58.7652       | 64.3505    | 74.0458    | 81.7102       | 91.4049       | 94.0867    | 94.5187    |
|    |                      |            |            |            |            |               |            |            |               |               |            |            |
|    | <b>Wrong results</b> | 20         | 4          | 2          | 4          | 7             | 11         | 16         | 19            | 19            | 20         | 20         |
|    | <b>Accuracy %</b>    | <b>50%</b> | <b>90%</b> | <b>95%</b> | <b>90%</b> | <b>82.50%</b> | <b>73%</b> | <b>60%</b> | <b>52.50%</b> | <b>52.50%</b> | <b>50%</b> | <b>50%</b> |
